# Supplementary material
Source: PubMed Central journal article supplement (PMC6247114)
Supplement: NIHMS980072-supplement-Supplemental_Digital_Content.pdf [file NIHMS980072-supplement-Supplemental_Digital_Content.pdf]

## **Appendix 1.**

In addition to the authors, other members of the *Eunice Kennedy Shriver* National Institute of Child Health and Human Development Maternal-Fetal Medicine Units Network are as follows:

*The University of Texas Health Science Center at Houston, McGovern Medical School-Children's*

*Memorial Hermann Hospital, Houston, TX* - S. Blackwell, F. Ortiz, B. Sibai (LBJ General Hospital), P. Givens, M. Phillips, L. Garcia (LBJ General Hospital), B. Rech

*University of Utah Health Sciences Center, Salt Lake City, UT* - K. Hill, S. Timothy, A. Sowles, E.

Clark, M. Varner, J. Stratford (McKay-Dee Hospital), S. Quinn, P. Reed (Intermountain Medical Center), M. Gertsch (UVRMC), M. Love (St. Mark's Hospital)

*University of Texas Medical Branch, Galveston, TX* - A. Salazar, J. Sikes, B. Aguillon, M. Wilson-

Jimenez, G. Hankins, G. Olson, M. Costantine, T. Wen, S. Nilsen, H. Harirah, L. Pacheco, S. Jain, S. Clark, M. Munn

*University of North Carolina at Chapel Hill, Chapel Hill, NC* - K. Clark, S. Timlin, M. Kearney, L.

Hitchings, S. Brody

*University of Alabama at Birmingham, Birmingham, AL* - J. Biggio, S. Harris, A. Todd, G. Adams,

J. Grant, L. Merin, M. Lee

*Columbia University, New York, NY* - R. Wapner, S. Bousleiman, A. Mermelstein, C. Torres, G.

Kaur, B. Leopanto (Drexel U), C. Tocci (Drexel U), J. Benson (Christiana H), S. Forester (Christiana H), C. Boutros (St. Peter's UH), M. Lake (St. Peter's UH)

Chauhan SP, Weiner SJ, Saade GR, Belfort MA, Reddy UA, Thorp JM, et al. Intrapartum fetal heart rate tracing among small-for-gestational age compared with appropriate-for-gestational-age neonates. *Obstet Gynecol* 2018; 132.

The authors provided this information as a supplement to their article.

©2018 American College of Obstetricians and Gynecologists.

Page 1 of 3

*Northwestern University, Chicago, IL* - A. Peaceman, G. Mallett, N. Dekker, A. Roy, M. Vanecko, E. Irwin, M. Dinsmoor (NorthShore University HealthSystem), K. Paychek (NorthShore University HealthSystem)

*The Ohio State University, Columbus, OH* - J. Iams, F. Johnson, K. Strafford, R. Ozug, K. Fennig, T. Dible, K. Snow

*MetroHealth Medical Center-Case Western Reserve University, Cleveland, OH* - E. Chien, C. Milluzzi, B. Mercer, W. Dalton, B. Stetzer, K. Kushner, L. Polito

*Brown University, Providence, RI* - D. Allard, B. Hughes, D. Cermik, B. Wallin, K. Grant, L. Beati, J. Rousseau

*University of Colorado School of Medicine, Anschutz Medical Campus, Aurora, CO* - K. Hale, N. Behrendt, M. Donnelly, S. Andrews, G. Moore, J. Hurt

*Stanford University, Stanford, CA* - K. Kushniruk, M. Norton, A. Monk, E. Kogut, C. Willson, K. Harney, J. Kassis, K. Milan

*Wayne State University, Detroit, MI* - N. Hauff, D. Driscoll, P. Lockhart

*University of Pittsburgh, Pittsburgh, PA* - H. Simhan, M. Cotroneo, H. Birkland

*The George Washington University Biostatistics Center, Washington, DC* - E. Thom, D. Mapp, L. Powers-Happ, M. Dingman, L.S. Firrell, B. Broderick, A. Shaver, V. Donohue

*Eunice Kennedy Shriver National Institute of Child Health and Human Development, Bethesda, MD* - C. Spong, S. Tolivaisa

MFMU Network Steering Committee Chair (*Medical University of South Carolina, Charleston, SC*) - J.P. VanDorsten, M.D.

Chauhan SP, Weiner SJ, Saade GR, Belfort MA, Reddy UA, Thorp JM, et al. Intrapartum fetal heart rate tracing among small-for-gestational age compared with appropriate-for-gestational-age neonates. *Obstet Gynecol* 2018; 132.

The authors provided this information as a supplement to their article.

©2018 American College of Obstetricians and Gynecologists.

Chauhan SP, Weiner SJ, Saade GR, Belfort MA, Reddy UA, Thorp JM, et al. Intrapartum fetal heart rate tracing among small-for-gestational age compared with appropriate-for-gestational-age neonates . *Obstet Gynecol* 2018; 132.

The authors provided this information as a supplement to their article.

©2018 American College of Obstetricians and Gynecologists.
